# Supplementary material
Source: PubMed Central journal article supplement (PMC3073450)

**S1**

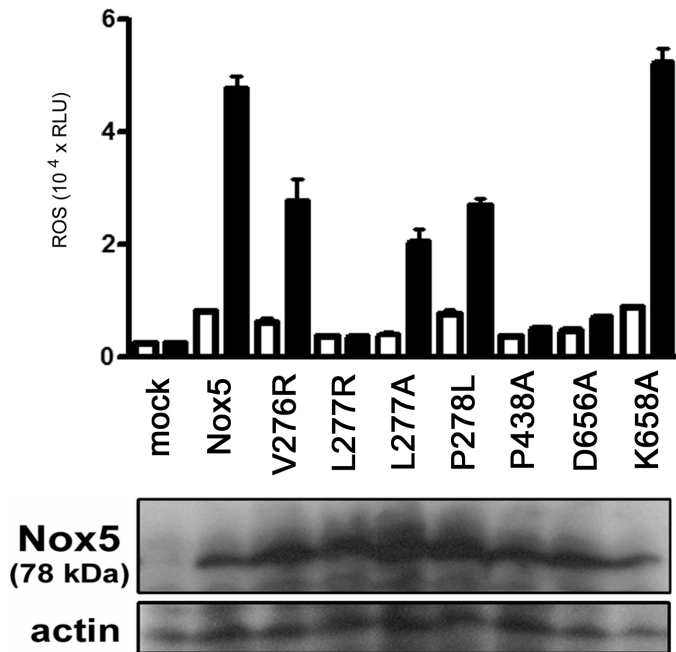

**S2**

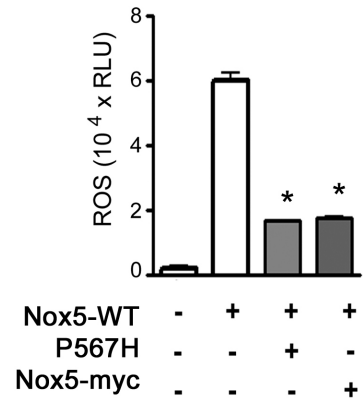

**S3**

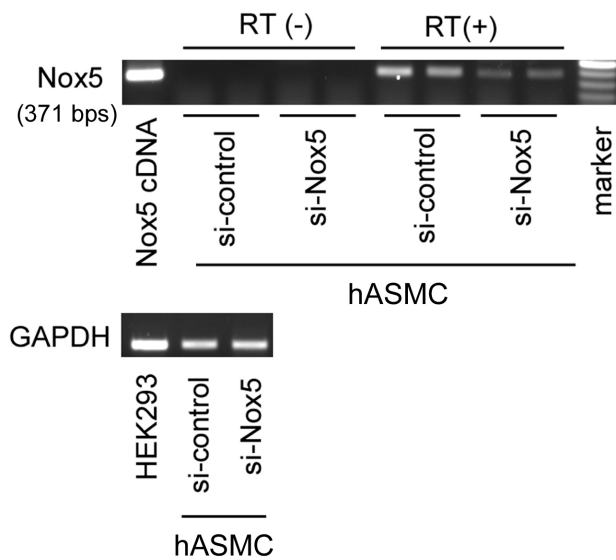

**S4**

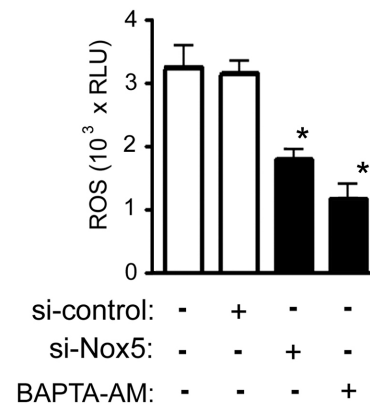

Supplement: NIHMS277676-supplement-2_si_002.pdf [file NIHMS277676-supplement-2_si_002.pdf]
